# Supplementary material
Source: PubMed Central journal article supplement (PMC7048652)

**Supplemental Fig. 1. IHC control images.** Representative photomicrographs of GR antiserum preadsorbed with recombinant GR protein (A), GFP antiserum applied to wild-type tissue (B), omission of antiserum for c-Fos (C), normal application of primary and secondary antisera for detection of c-Fos without tyramide amplification (D). White box indicates location of zoomed panels. Scale bar equals 20  $\mu\text{m}$ .

1 **Supplemental Table 1: Primer sequences for qPCR**

| Gene         | forward sequence        | reverse sequence       |
|--------------|-------------------------|------------------------|
| <i>Lhβ</i>   | CTGTCAACGCAACTCTGG      | ACAGGAGGCAAAGCAGC      |
| <i>Gnrhr</i> | GCCCCTTGCTGTACAAAGC     | CCGTCTGCTAGGTAGATCATCC |
| <i>Gapdh</i> | TGCACCACCAACTGCTTAG     | GGATGCAGGGATGATGTTC    |
| <i>Gr</i>    | CAAAGCCGTTTCACTGTCC     | ACAATTTCACTGCCACC      |
| <i>Kiss1</i> | CCCTTCCTCCCAGAATGATC    | TCCCAGGCATTAACGAGTTC   |
| <i>pDyn</i>  | AGCAGTAAGCAGGTCATTCATCC | CACGCCATTCTGACTCACTTGT |
| <i>Tac2</i>  | CGTGACATGCACGACTTC      | CCAACAGGAGGACCTTAC     |
| <i>Eraα</i>  | GCGCAAGTGTTACGAAGTG     | TTCGGCCTTCCAAGTCATC    |
| <i>Oprκ</i>  | AACCAAAGCATCTGCCAAAG    | ATTTGTGGTGGGCTTAGTGG   |
| <i>Tac3r</i> | TACACCATCGTTGGAATTAC    | ATGTCACCACCACAATAATC   |

1 **Supplemental Table 2: Mean LH, pulse frequency, and pulse amplitude in OVX + E mice**

| OVX      | Mean LH (ng/mL)           | Pulses/90 min            | Amplitude (ng/mL)         |
|----------|---------------------------|--------------------------|---------------------------|
| 0 ng E   | 4.46 ± 0.29 <sup>AB</sup> | 3.83 ± 0.17 <sup>A</sup> | 1.78 ± 0.27 <sup>A</sup>  |
| 20 ng E  | 4.44 ± 0.13 <sup>AB</sup> | 4.25 ± 0.48 <sup>A</sup> | 2.78 ± 0.72 <sup>AB</sup> |
| 40 ng E  | 5.49 ± 0.33 <sup>A</sup>  | 5.00 ± 0.00 <sup>A</sup> | 3.14 ± 0.28 <sup>B</sup>  |
| 100 ng E | 3.31 ± 0.31 <sup>B</sup>  | 2.82 ± 0.20 <sup>B</sup> | 2.69 ± 0.13 <sup>AB</sup> |

2 Values are mean ± SEM.

3 Values with unique superscripts are significantly different (p<0.05).

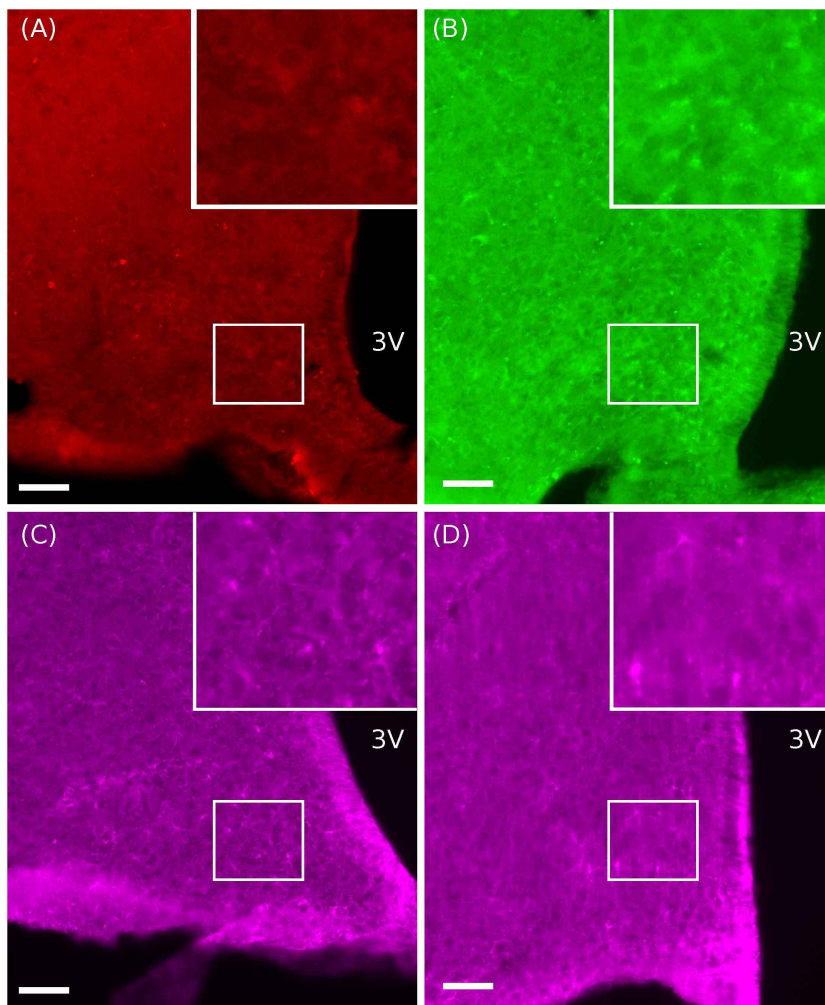

Supplement: NIHMS1052306-supplement-1.pdf [file NIHMS1052306-supplement-1.pdf]
